# Supplementary material
Source: PubMed Central journal article supplement (PMC3880597)
Supplement: NIHMS527570-supplement-001.pdf [file NIHMS527570-supplement-001.pdf]

## SUPPORTING INFORMATION

### ***O*-Phenyl Carbamate and Phenyl Urea Thiiranes as Selective MMP-2 Inhibitors that Cross the Blood-Brain Barrier**

Major Gooyit,<sup>†</sup> Wei Song,<sup>†</sup> Kiran V. Mahasenan,<sup>†</sup> Katerina Lichtenwalter,<sup>†</sup> Mark A. Suckow,<sup>‡</sup>  
Valerie A. Schroeder,<sup>‡</sup> William R. Wolter,<sup>‡</sup> Shahriar Mobashery,<sup>†</sup> and Mayland Chang<sup>†\*</sup>

<sup>†</sup>Department of Chemistry and Biochemistry, University of Notre Dame, Notre Dame, Indiana  
46556, USA

<sup>‡</sup>Freimann Life Sciences Center and Department of Biological Sciences, University of Notre  
Dame, Notre Dame, Indiana 46556, USA

#### **Corresponding Author:**

Tel: +1-574-631-2965. Fax: +1-574-631-6652. E-mail: [mchang@nd.edu](mailto:mchang@nd.edu)

#### **Contents of Supporting Information**

##### Supporting Tables

1. Kinetics parameters for the slow-binding inhibition of MMPs.....S1
2. Concentrations of compound **2** after a single sc dose of compound **5b** to mice .....S2
3. Concentrations of compound **6b** after a single sc dose of compound **6b** to mice .....S3

**Table S1:** Kinetic Parameters for the Slow-binding Inhibition of MMPs

| Inhibitor | Structure | Enzyme                | $10^{-3} k_{\text{on}} (\text{M}^{-1}\text{s}^{-1})$ | $10^4 k_{\text{off}} (\text{s}^{-1})$ | $K_i (\mu\text{M})$ |
|-----------|-----------|-----------------------|------------------------------------------------------|---------------------------------------|---------------------|
| <b>4a</b> |           | MMP-2                 | $3.1 \pm 0.3$                                        | $4.9 \pm 0.2$                         | $0.16 \pm 0.02$     |
|           |           | MMP-9 <sub>cat</sub>  | $4.8 \pm 0.4$                                        | $11 \pm 3$                            | $0.23 \pm 0.06$     |
|           |           | MMP-14 <sub>cat</sub> | $0.47 \pm 0.02$                                      | $11 \pm 1$                            | $2.4 \pm 0.2$       |
| <b>4b</b> |           | MMP-2                 | $3.4 \pm 0.4$                                        | $7.8 \pm 2.1$                         | $0.23 \pm 0.07$     |
|           |           | MMP-9 <sub>cat</sub>  | $1.5 \pm 0.1$                                        | $14 \pm 1$                            | $0.93 \pm 0.02$     |
|           |           | MMP-14 <sub>cat</sub> | $0.70 \pm 0.06$                                      | $19 \pm 2$                            | $2.7 \pm 0.3$       |
| <b>4c</b> |           | MMP-2                 | $1.8 \pm 0.1$                                        | $8.7 \pm 3.1$                         | $0.31 \pm 0.08$     |
|           |           | MMP-9 <sub>cat</sub>  | $1.2 \pm 0.2$                                        | $12 \pm 1$                            | $1.0 \pm 0.2$       |
|           |           | MMP-14 <sub>cat</sub> | $0.54 \pm 0.05$                                      | $16 \pm 1$                            | $2.8 \pm 0.2$       |
| <b>4d</b> |           | MMP-2                 | $3.2 \pm 0.8$                                        | $9.9 \pm 0.4$                         | $0.48 \pm 0.02$     |
|           |           | MMP-9 <sub>cat</sub>  | $1.1 \pm 0.1$                                        | $14 \pm 2$                            | $1.3 \pm 0.3$       |
|           |           | MMP-14 <sub>cat</sub> | $0.18 \pm 0.01$                                      | $5.0 \pm 0.2$                         | $3.0 \pm 0.3$       |
| <b>5a</b> |           | MMP-2                 | $1.7 \pm 0.1$                                        | $6.4 \pm 0.3$                         | $0.39 \pm 0.03$     |
|           |           | MMP-9 <sub>cat</sub>  | $0.082 \pm 0.007$                                    | $8.6 \pm 0.5$                         | $10 \pm 1$          |
|           |           | MMP-14 <sub>cat</sub> | $0.048 \pm 0.005$                                    | $6.0 \pm 0.5$                         | $12 \pm 2$          |
| <b>5b</b> |           | MMP-2                 | $0.69 \pm 0.05$                                      | $3.8 \pm 0.4$                         | $0.55 \pm 0.08$     |
|           |           | MMP-9 <sub>cat</sub>  | $0.068 \pm 0.006$                                    | $8.5 \pm 0.7$                         | $12 \pm 2$          |
|           |           | MMP-14 <sub>cat</sub> | $0.050 \pm 0.002$                                    | $8.5 \pm 0.3$                         | $17 \pm 1$          |
| <b>5c</b> |           | MMP-2                 | $0.46 \pm 0.03$                                      | $3.5 \pm 0.3$                         | $0.76 \pm 0.09$     |
|           |           | MMP-9 <sub>cat</sub>  | $0.021 \pm 0.003$                                    | $11 \pm 1$                            | $52 \pm 8$          |
|           |           | MMP-14 <sub>cat</sub> | $0.054 \pm 0.005$                                    | $14 \pm 1$                            | $27 \pm 2$          |
| <b>5d</b> |           | MMP-2                 | $0.21 \pm 0.05$                                      | $1.5 \pm 0.6$                         | $0.69 \pm 0.32$     |
| <b>6a</b> |           | MMP-2                 | $3.1 \pm 0.4$                                        | $7.5 \pm 1.4$                         | $0.24 \pm 0.05$     |
|           |           | MMP-9 <sub>cat</sub>  | $0.12 \pm 0.01$                                      | $12 \pm 1$                            | $9.9 \pm 0.6$       |
|           |           | MMP-14 <sub>cat</sub> | $0.024 \pm 0.003$                                    | $10 \pm 1$                            | $19 \pm 2$          |
| <b>6b</b> |           | MMP-2                 | $1.5 \pm 0.1$                                        | $6.8 \pm 0.7$                         | $0.44 \pm 0.06$     |
|           |           | MMP-8 <sub>cat</sub>  | $0.14 \pm 0.01$                                      | $24 \pm 2$                            | $17 \pm 2$          |
| <b>6c</b> |           | MMP-2                 | $1.5 \pm 0.2$                                        | $8.1 \pm 0.8$                         | $0.56 \pm 0.09$     |
| <b>6d</b> |           | MMP-2                 | $2.2 \pm 0.1$                                        | $8.7 \pm 0.5$                         | $0.42 \pm 0.03$     |

| Inhibitor | Structure | Enzyme                | $10^{-3} k_{\text{on}} (\text{M}^{-1} \text{s}^{-1})$ | $10^4 k_{\text{off}} (\text{s}^{-1})$ | $K_i (\mu\text{M})$ |
|-----------|-----------|-----------------------|-------------------------------------------------------|---------------------------------------|---------------------|
| <b>7a</b> |           | MMP-2                 | $5.6 \pm 0.3$                                         | $2.8 \pm 1.1$                         | $0.050 \pm 0.020$   |
|           |           | MMP-9 <sub>cat</sub>  | $4.7 \pm 0.5$                                         | $8.5 \pm 1.2$                         | $0.18 \pm 0.03$     |
|           |           | MMP-14 <sub>cat</sub> | $0.29 \pm 0.04$                                       | $7.5 \pm 0.7$                         | $2.6 \pm 0.4$       |
|           |           | MMP-8 <sub>cat</sub>  | $0.059 \pm 0.005$                                     | $7.7 \pm 0.6$                         | $13 \pm 2$          |
| <b>7b</b> |           | MMP-2                 | $2.5 \pm 0.3$                                         | $7.2 \pm 1.3$                         | $0.29 \pm 0.06$     |
|           |           | MMP-9 <sub>cat</sub>  | $0.76 \pm 0.05$                                       | $6.5 \pm 0.7$                         | $0.86 \pm 0.11$     |
|           |           | MMP-14 <sub>cat</sub> | $0.43 \pm 0.02$                                       | $8.2 \pm 0.6$                         | $1.9 \pm 0.2$       |
|           |           | MMP-8 <sub>cat</sub>  | $0.24 \pm 0.01$                                       | $35 \pm 6$                            | $15 \pm 3$          |
| <b>7c</b> |           | MMP-2                 | $0.91 \pm 0.13$                                       | $4.4 \pm 0.3$                         | $0.49 \pm 0.08$     |
|           |           | MMP-9 <sub>cat</sub>  | $0.57 \pm 0.06$                                       | $6.2 \pm 0.6$                         | $1.1 \pm 0.1$       |
|           |           | MMP-14 <sub>cat</sub> | $0.30 \pm 0.02$                                       | $6.4 \pm 0.4$                         | $2.1 \pm 0.2$       |
| <b>7d</b> |           | MMP-2                 | $1.3 \pm 0.2$                                         | $9.1 \pm 1.0$                         | $0.68 \pm 0.13$     |
|           |           | MMP-9 <sub>cat</sub>  | $0.30 \pm 0.05$                                       | $8.0 \pm 0.1$                         | $2.7 \pm 0.6$       |
|           |           | MMP-14 <sub>cat</sub> | $0.25 \pm 0.04$                                       | $6.2 \pm 0.9$                         | $2.5 \pm 0.4$       |

**Table S2.** Concentrations of Compound **2** after a Single SC Dose of Compound **5b** to Mice at 25 mg/kg

| Time (min) | Compound <b>2</b> in Brain <sup>a</sup> | Compound <b>2</b> in Plasma <sup>b</sup> |
|------------|-----------------------------------------|------------------------------------------|
| 10         | $0.405 \pm 0.101$                       | $1.24 \pm 0.676$                         |
| 20         | $1.35 \pm 1.10$                         | $1.05 \pm 0.318$                         |
| 30         | $0.726 \pm 0.0997$                      | $0.574 \pm 0.345$                        |
| 45         | $0.383 \pm 0.0630$                      | $0.493 \pm 0.0967$                       |
| 60         | $0.471 \pm 0.0676$                      | $0.302 \pm 0.0343$                       |
| 90         | $0.275 \pm 0.0159$                      | $0.185 \pm 0.0224$                       |
| 120        | $0.331 \pm 0.0712$                      | $0.183 \pm 0.0565$                       |
| 180        | $0.252 \pm 0.0400$                      | $0.0949 \pm 0.0186$                      |
| 240        | $0.255 \pm 0.0154$                      | $0.114 \pm 0.0147$                       |

<sup>a</sup> Concentration in pmol/mg tissue

<sup>b</sup> Concentration in  $\mu\text{M}$

**Table S3.** Concentrations of Compound **6b** after a Single SC Dose of Compound **6b** to Mice at 25 mg/kg

| Time (min) | Compound <b>6b</b> in Brain <sup>a</sup> | Compound <b>6b</b> in Plasma <sup>b</sup> |
|------------|------------------------------------------|-------------------------------------------|
| 10         | $0.114 \pm 0.0193$                       | $4.39 \pm 0.303$                          |
| 20         | $0.0779 \pm 0.012$                       | $1.92 \pm 0.472$                          |
| 40         | $0.0627 \pm 0.0246$                      | $1.10 \pm 0.475$                          |
| 90         | $0.0351 \pm 0.00751$                     | $0.530 \pm 0.285$                         |
| 180        | $0.0200 \pm 0.00490$                     | $0.270 \pm 0.0252$                        |
| 300        | $0.0133 \pm 0.00337$                     | $0.0704 \pm 0.0506$                       |

<sup>a</sup> Concentration in pmol/mg tissue

<sup>b</sup> Concentration in  $\mu\text{M}$
